# Supplementary material for: Large-scale englacial folding and deep-ice stratigraphy within the West Antarctic Ice Sheet
Source: Copernicus journal article supplement (doi:10.5194/tc-14-2103-2020), 2020-06-30
Supplement: Supplementary file 5 [file tc-14-2103-2020-supplement.zip]

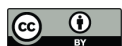

## *Supplement of*

# **Large-scale englacial folding and deep-ice stratigraphy within the West Antarctic Ice Sheet**

**Neil Ross et al.**

*Correspondence to:* Neil Ross ([neil.ross@newcastle.ac.uk](mailto:neil.ross@newcastle.ac.uk))

- [tc-14-2103-2020-supplement-title-page.pdf](#)
- [SI\\_Figure1\\_tie9\\_new.pdf](#)
- [SI\\_Figure2\\_tie10\\_new.pdf](#)
- [SI\\_Figure3\\_tie11\\_new.pdf](#)
- [SI\\_Figure4\\_tie12\\_new.pdf](#)

The copyright of individual parts of the supplement might differ from the CC BY 4.0 License.
